# Supplementary material for: mef2ca and mef2cb Double Mutant Zebrafish Show Altered Craniofacial Phenotype and Motor Behaviour
Source: MDPI journal article supplement (doi:10.3390/biom13050805), 2023-05-09
Supplement: s1 [file s1]

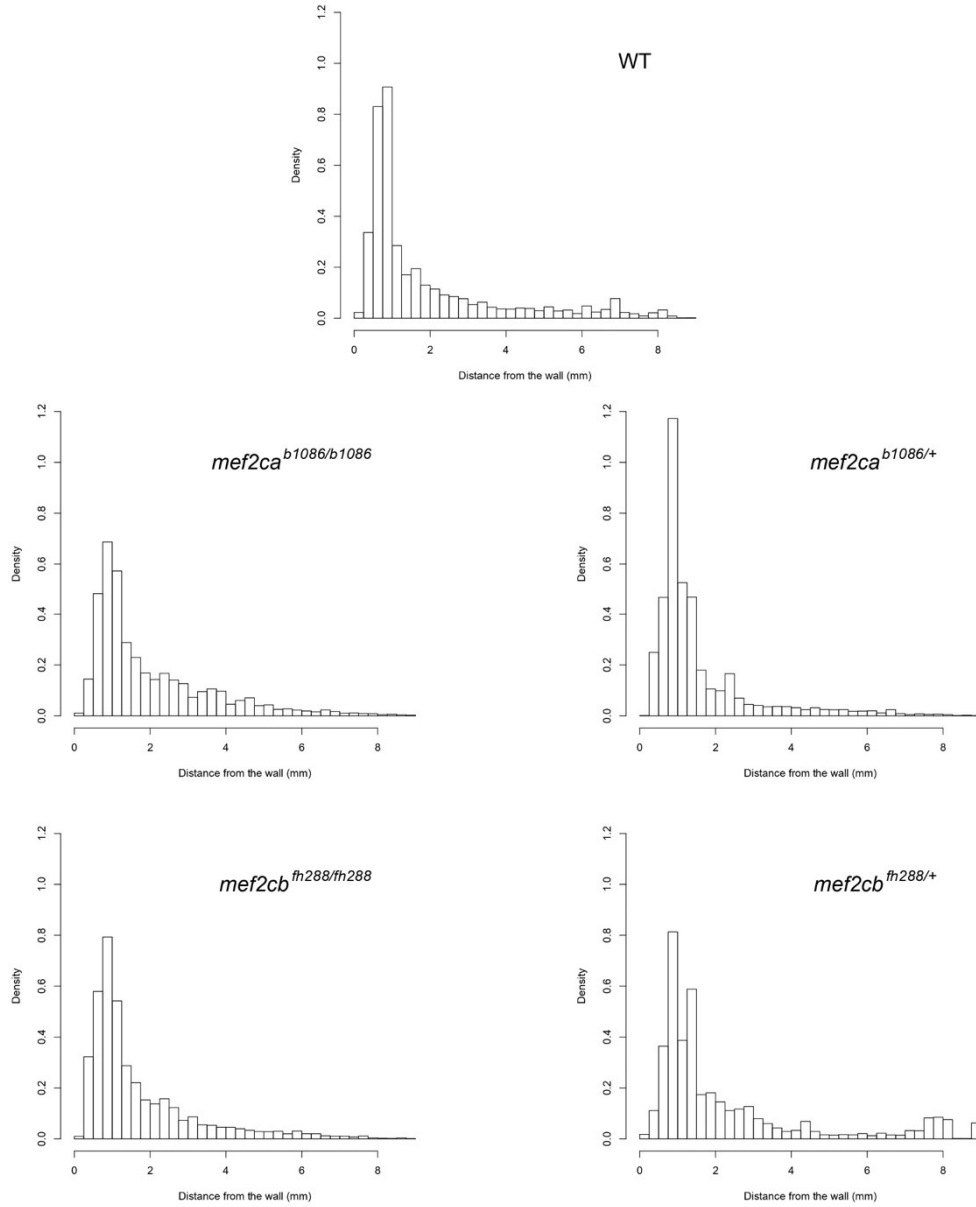

Figure S1: Histograms of the radial distance from the wall for the five groups analysed: WT (N=26), *mef2ca*<sup>b1086/b1086</sup> (N=29), *mef2ca*<sup>b1086/+</sup> (N=19), *mef2cb*<sup>fh288/fh288</sup> (N=30) and *mef2cb*<sup>fh288/+</sup> (N=30). Notice the inversion of the axis direction to facilitate distribution adjustment.

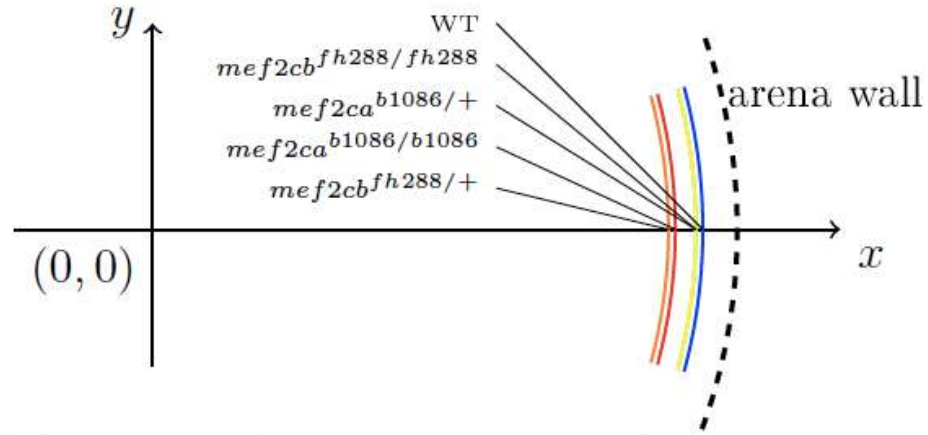

**Figure S2:** Location of the median of the swimming radial distance for the five groups analysed: WT (N=26) in blue,  $mef2ca^{b1086/b1086}$  (N=29) in red,  $mef2ca^{b1086/+}$  (N=19) in yellow,  $mef2cb^{fh288/fh288}$  (N=30) in green and  $mef2cb^{fh288/+}$  (N=30) in orange.

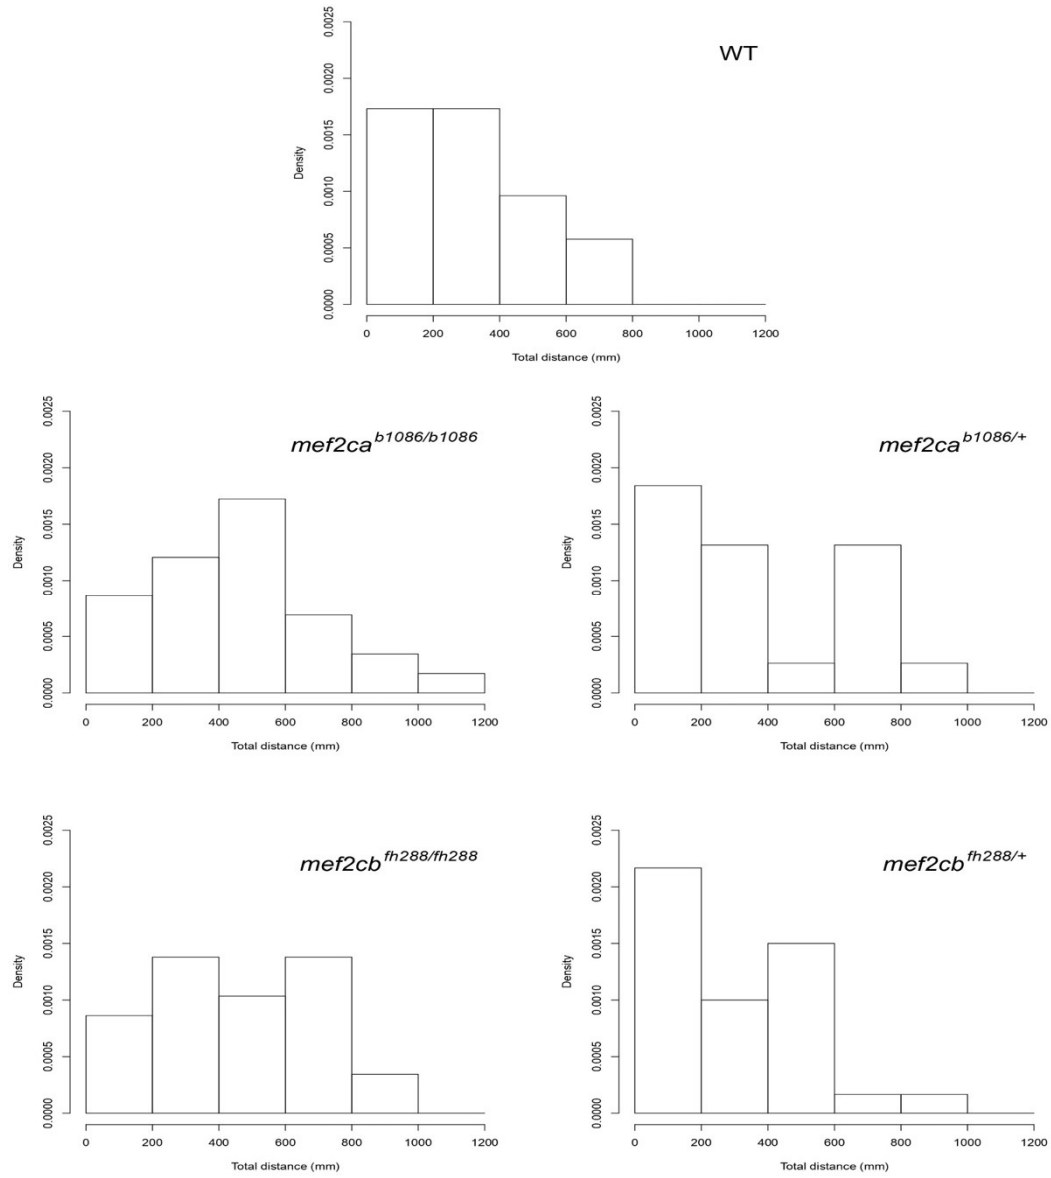

**Figure S3:** Histograms of the total distance covered by each fish for the five groups analysed: WT (N=26), *mef2ca<sup>b1086/b1086</sup>* (N=29), *mef2ca<sup>b1086/+</sup>* (N=19), *mef2cb<sup>fh288/fh288</sup>* (N=30) and *mef2cb<sup>fh288/+</sup>* (N=30).
